# Supplementary material for: Formulation, Preparation, Characterization, and Evaluation of Dicarboxylic Ionic Liquid Donepezil Transdermal Patches
Source: MDPI journal article supplement (doi:10.3390/pharmaceutics14010205), 2022-01-16
Supplement: s1 [file s1]

# **Supplementary Materials: Formulation, Preparation, Characterization, and Evaluation of Dicarboxylic Ionic Liquid Donepezil Transdermal Patches**

Linh Dinh, Soohun Lee, Sharif Md Abuzar, Heejun Park and Sung-Joo Hwang

Standard  $^1\text{H}$  NMR Chloroform-D ( $\text{D}$ , 99.8%) + 0.05 % TMS + silver foil (Cambridge Isotope Laboratories, Andover, MA, USA) solvent  
 $^1\text{H}$  NMR spectra of DPZ ILs

CDCl<sub>3</sub>\_TMS

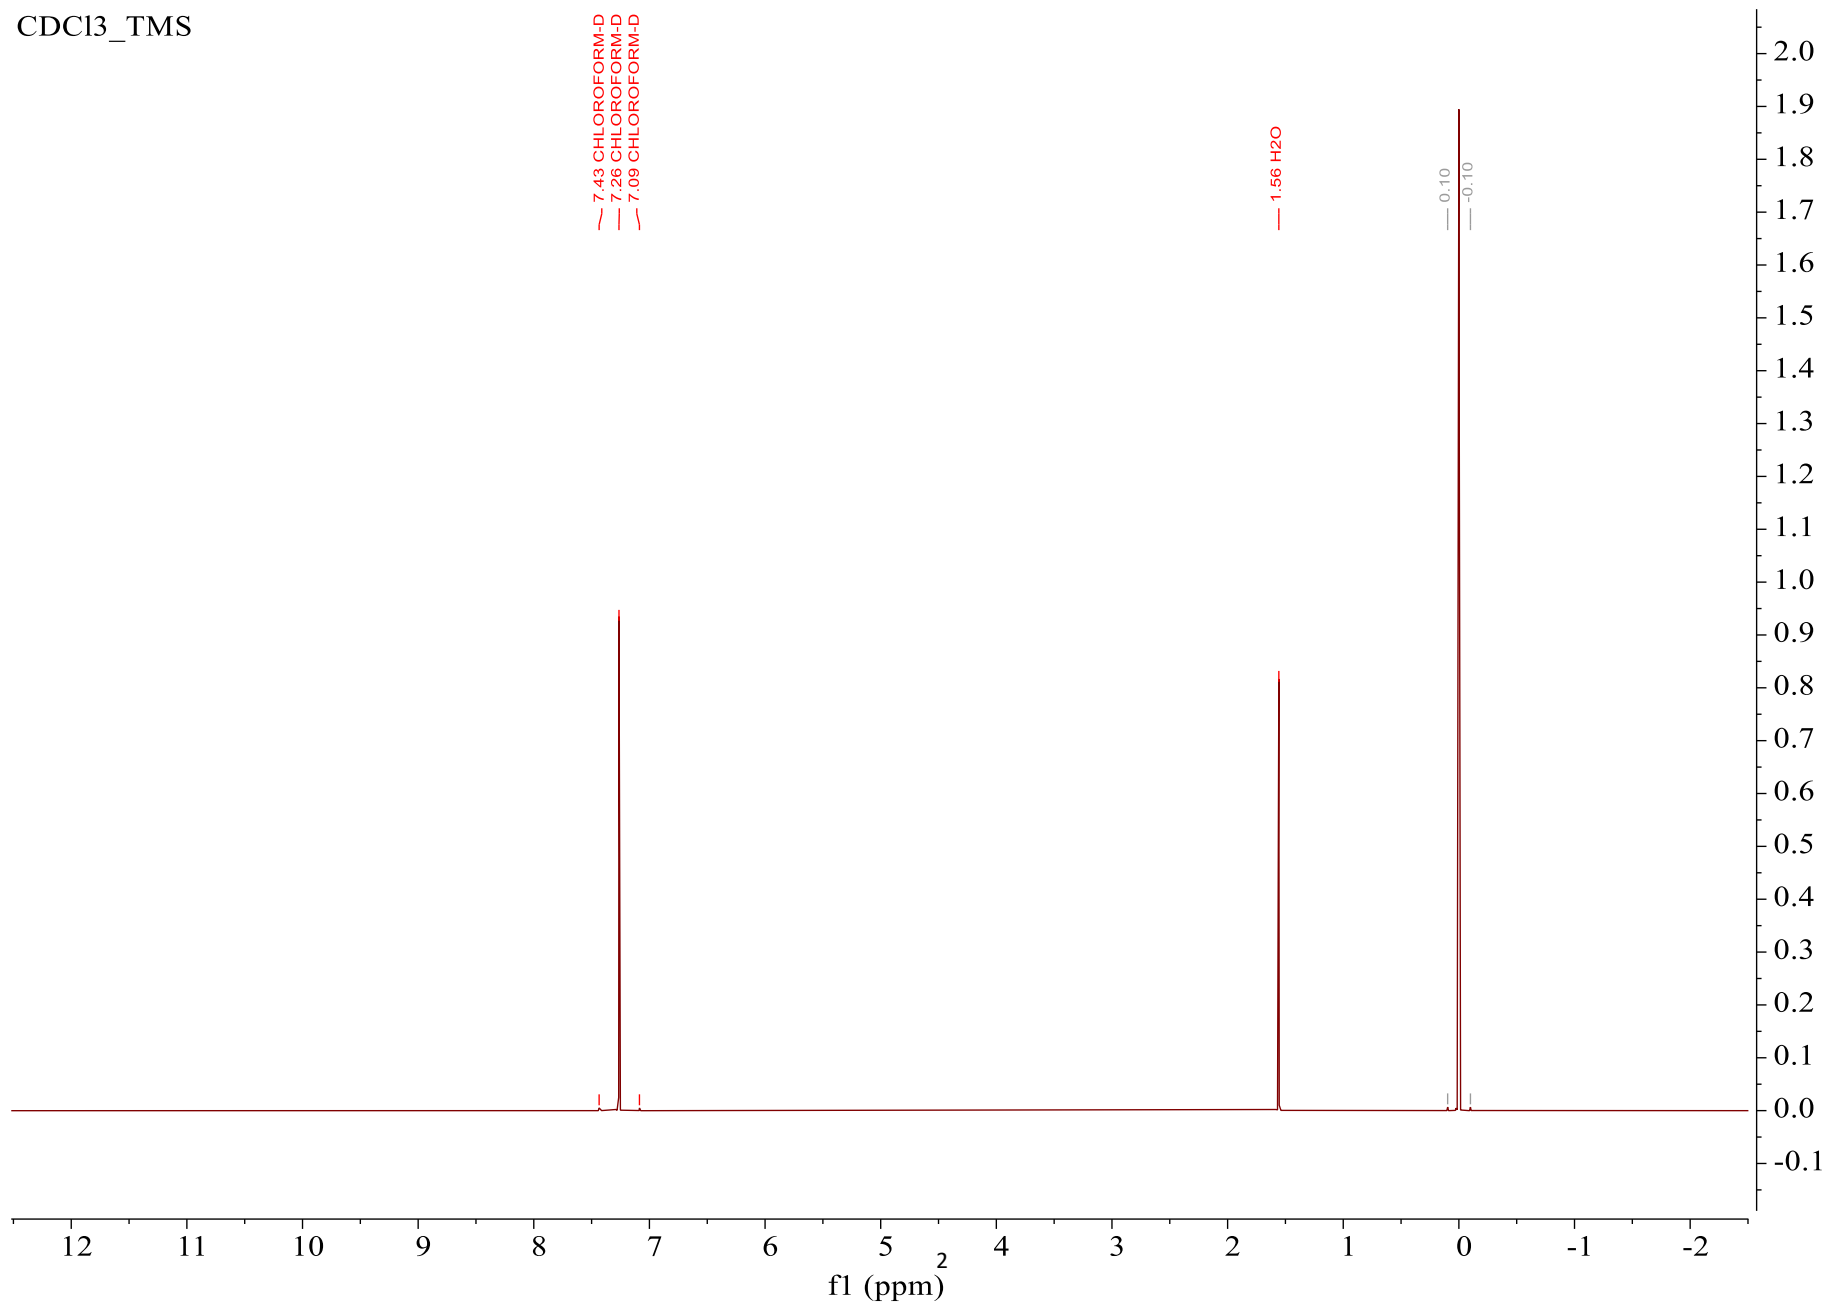

**Figure S1.**  $^1\text{H}$  NMR spectrum of DPZ-adipic acid IL.  $^1\text{H}$  NMR (600 MHz,  $\text{CHCl}_3$ - $d_3$ )  $\delta$  7.31 – 7.20 (m, 5H), 7.19 (s, 2H), 7.09 (s, 1H), 6.78 (s, 1H), 3.89 (s, 3H), 3.83 (s, 3H), 3.65 (q,  $J = 7.1$  Hz, 4H), 3.20 – 3.13 (m, 1H), 3.06 – 2.98 (m, 2H), 2.66 – 2.58 (m, 2H), 2.35 – 2.24 (m, 2H), 2.12 (d,  $J = 10.6$  Hz, 1H), 2.08 (d,  $J = 10.8$  Hz, 1H), 1.87 – 1.77 (m, 1H), 1.72 – 1.65 (m, 4H), 1.46 – 1.33 (m, 3H), 1.33 – 1.22 (m, 2H), 1.18 (t,  $J = 7.0$  Hz, 6H), 0.84 – 0.74 (m, 2H).

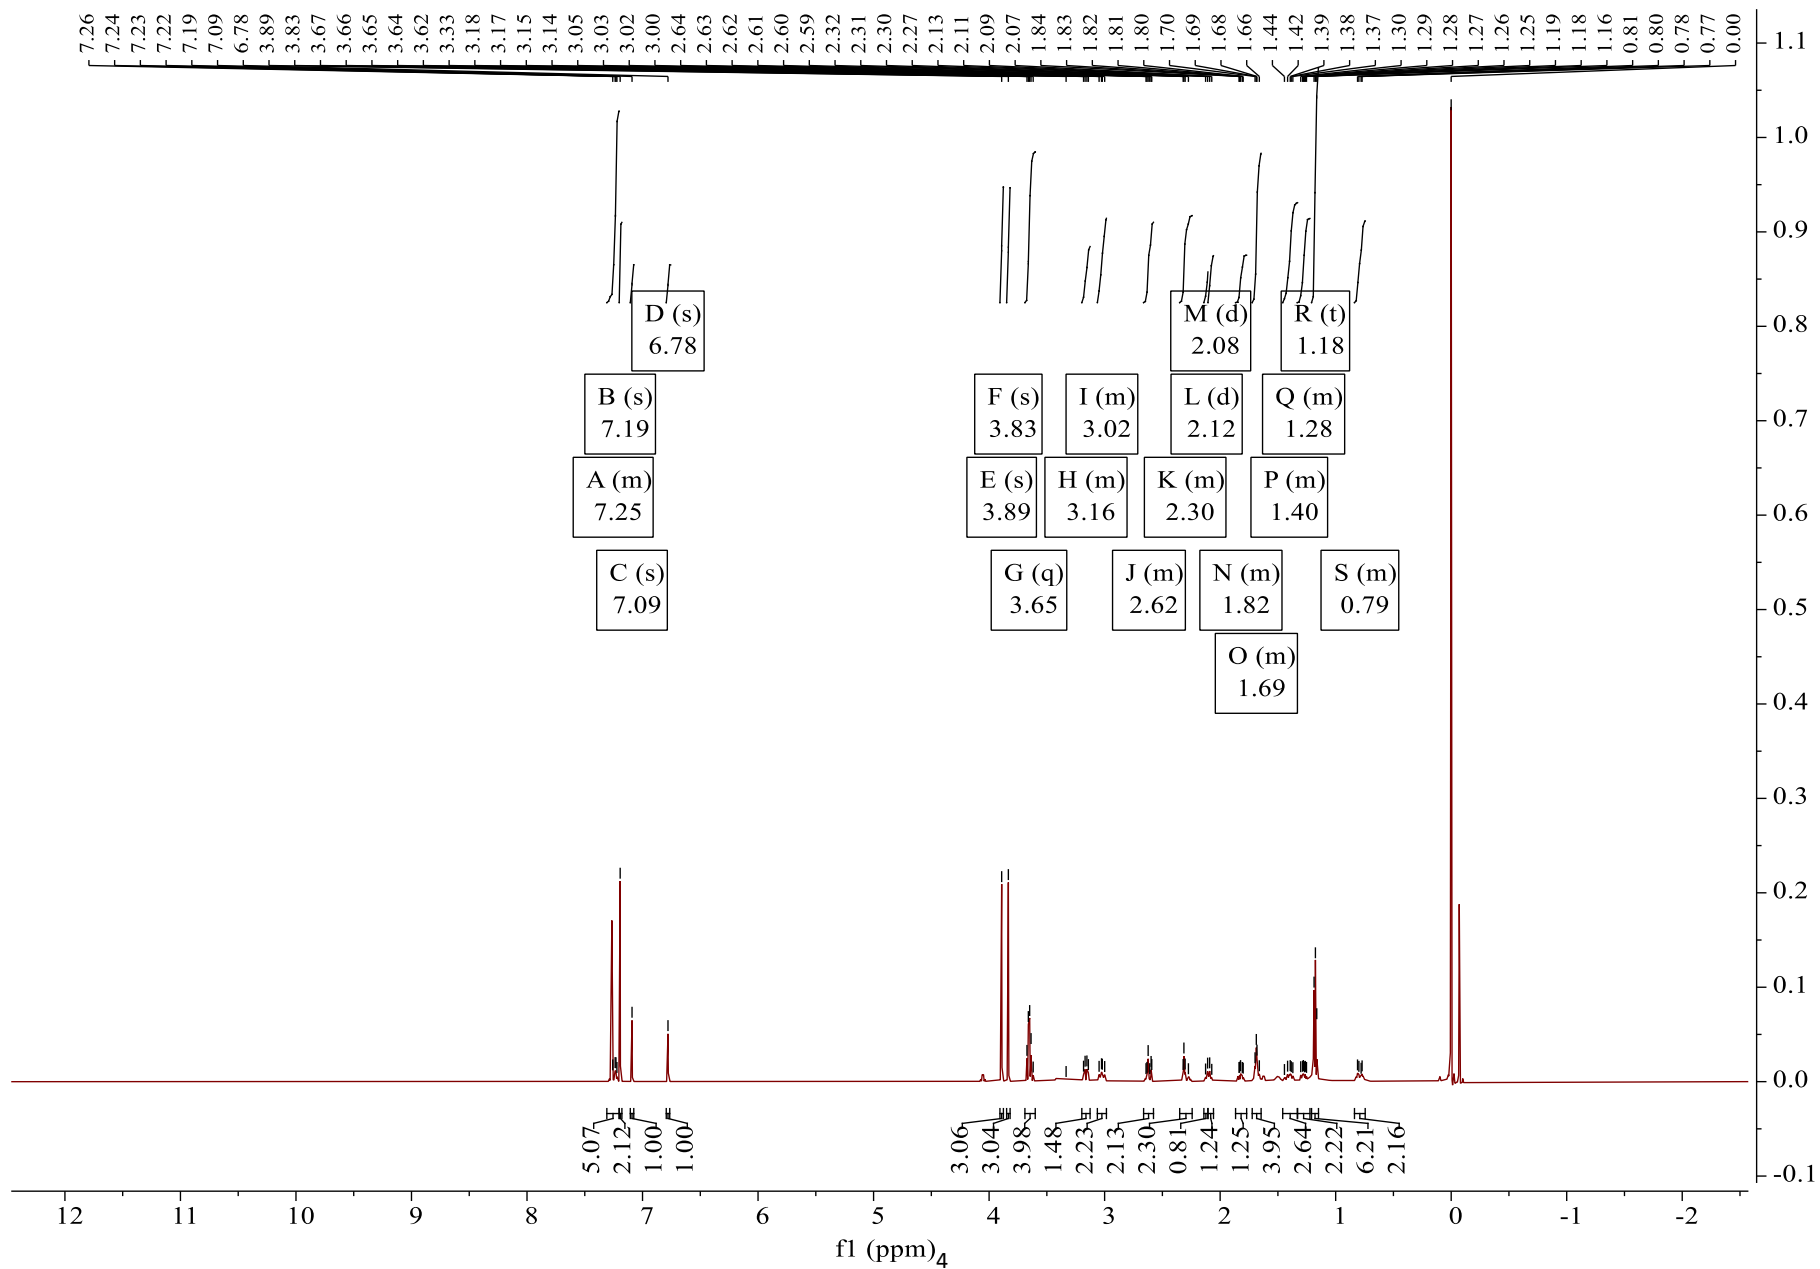

DPZ-adipic acid IL

**Figure S2.**  $^1\text{H}$  NMR spectrum of DPZ-azelaic acid IL.

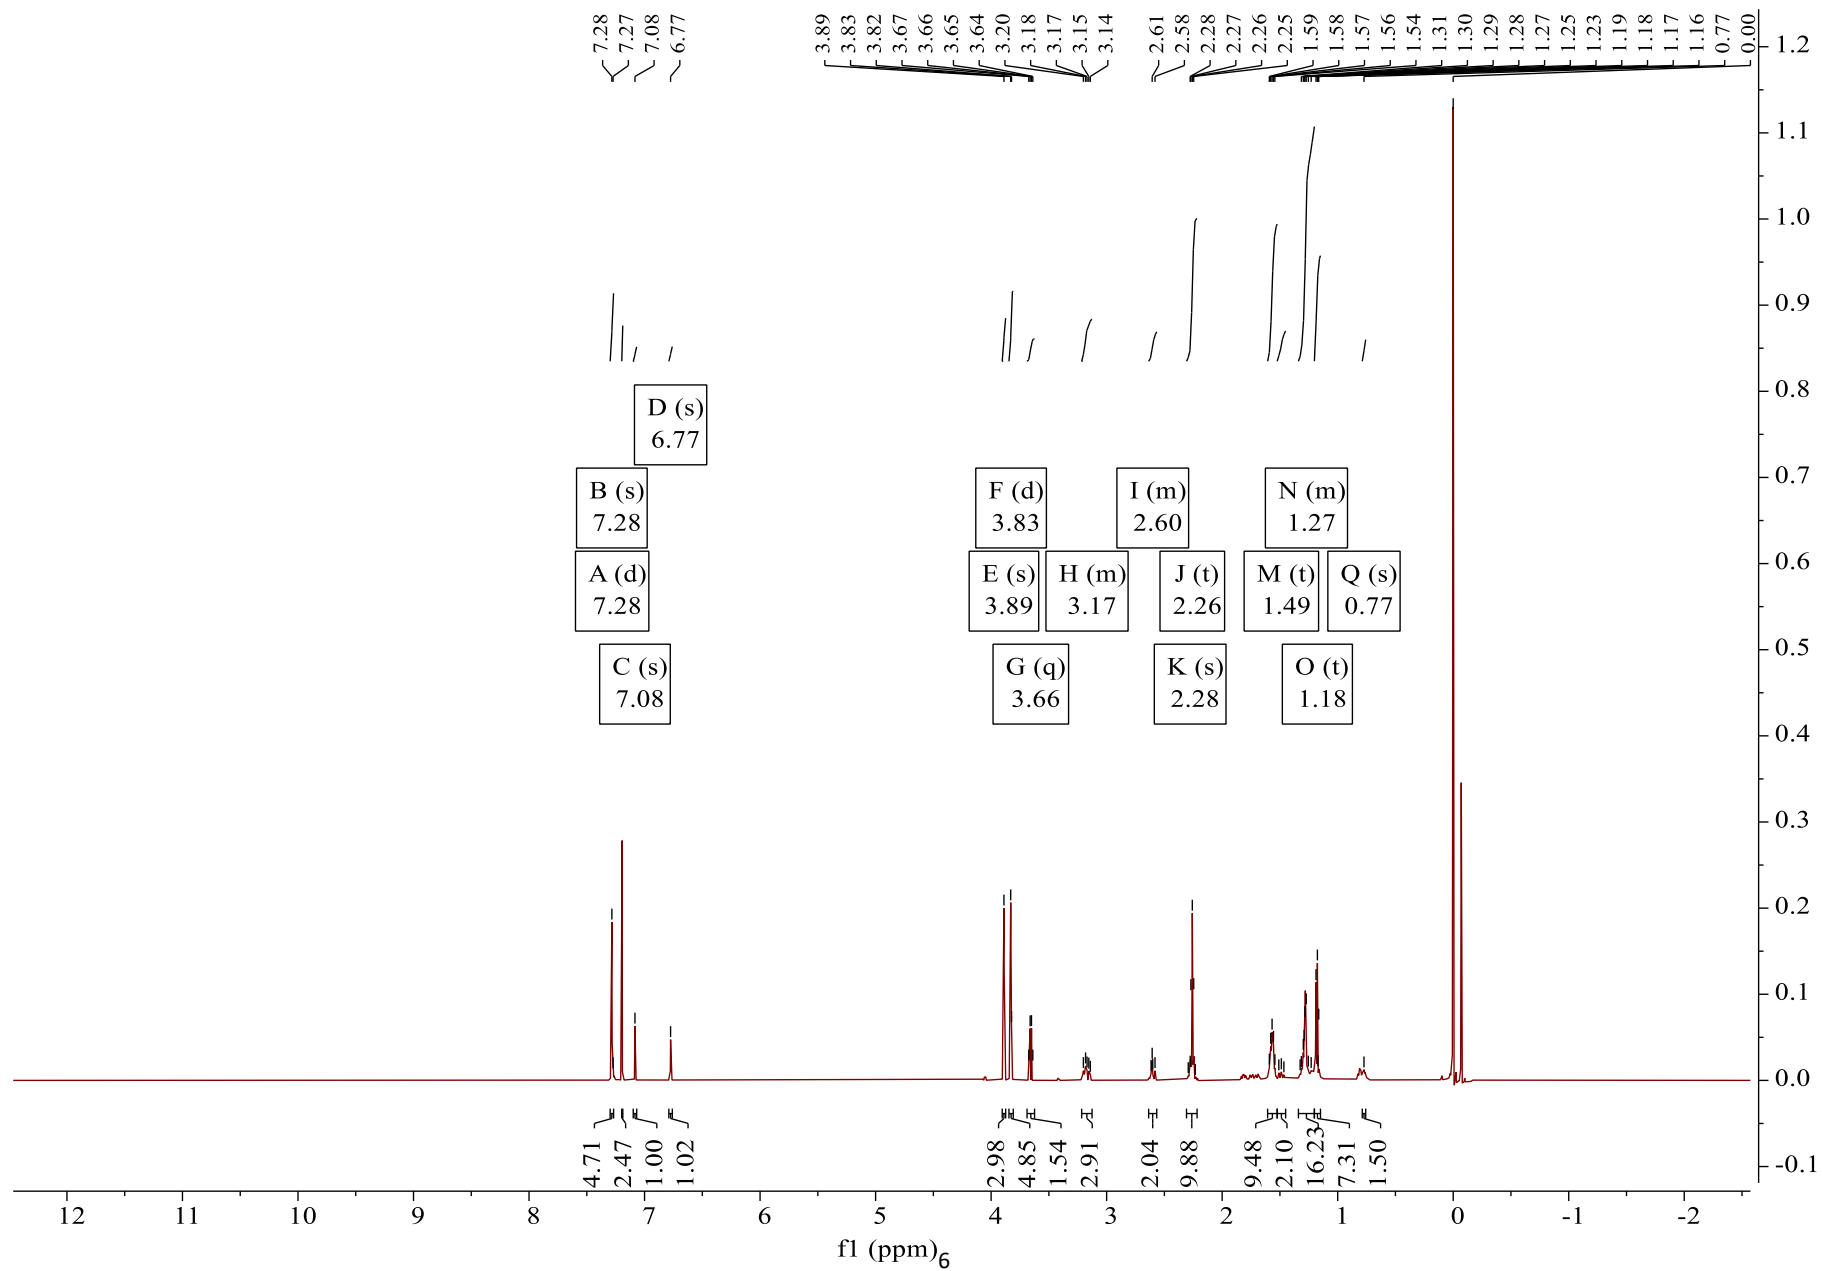

DPZ-azelaic acid IL

**Figure S3.**  $^1\text{H}$  NMR spectrum of DPZ-glutaric acid IL.

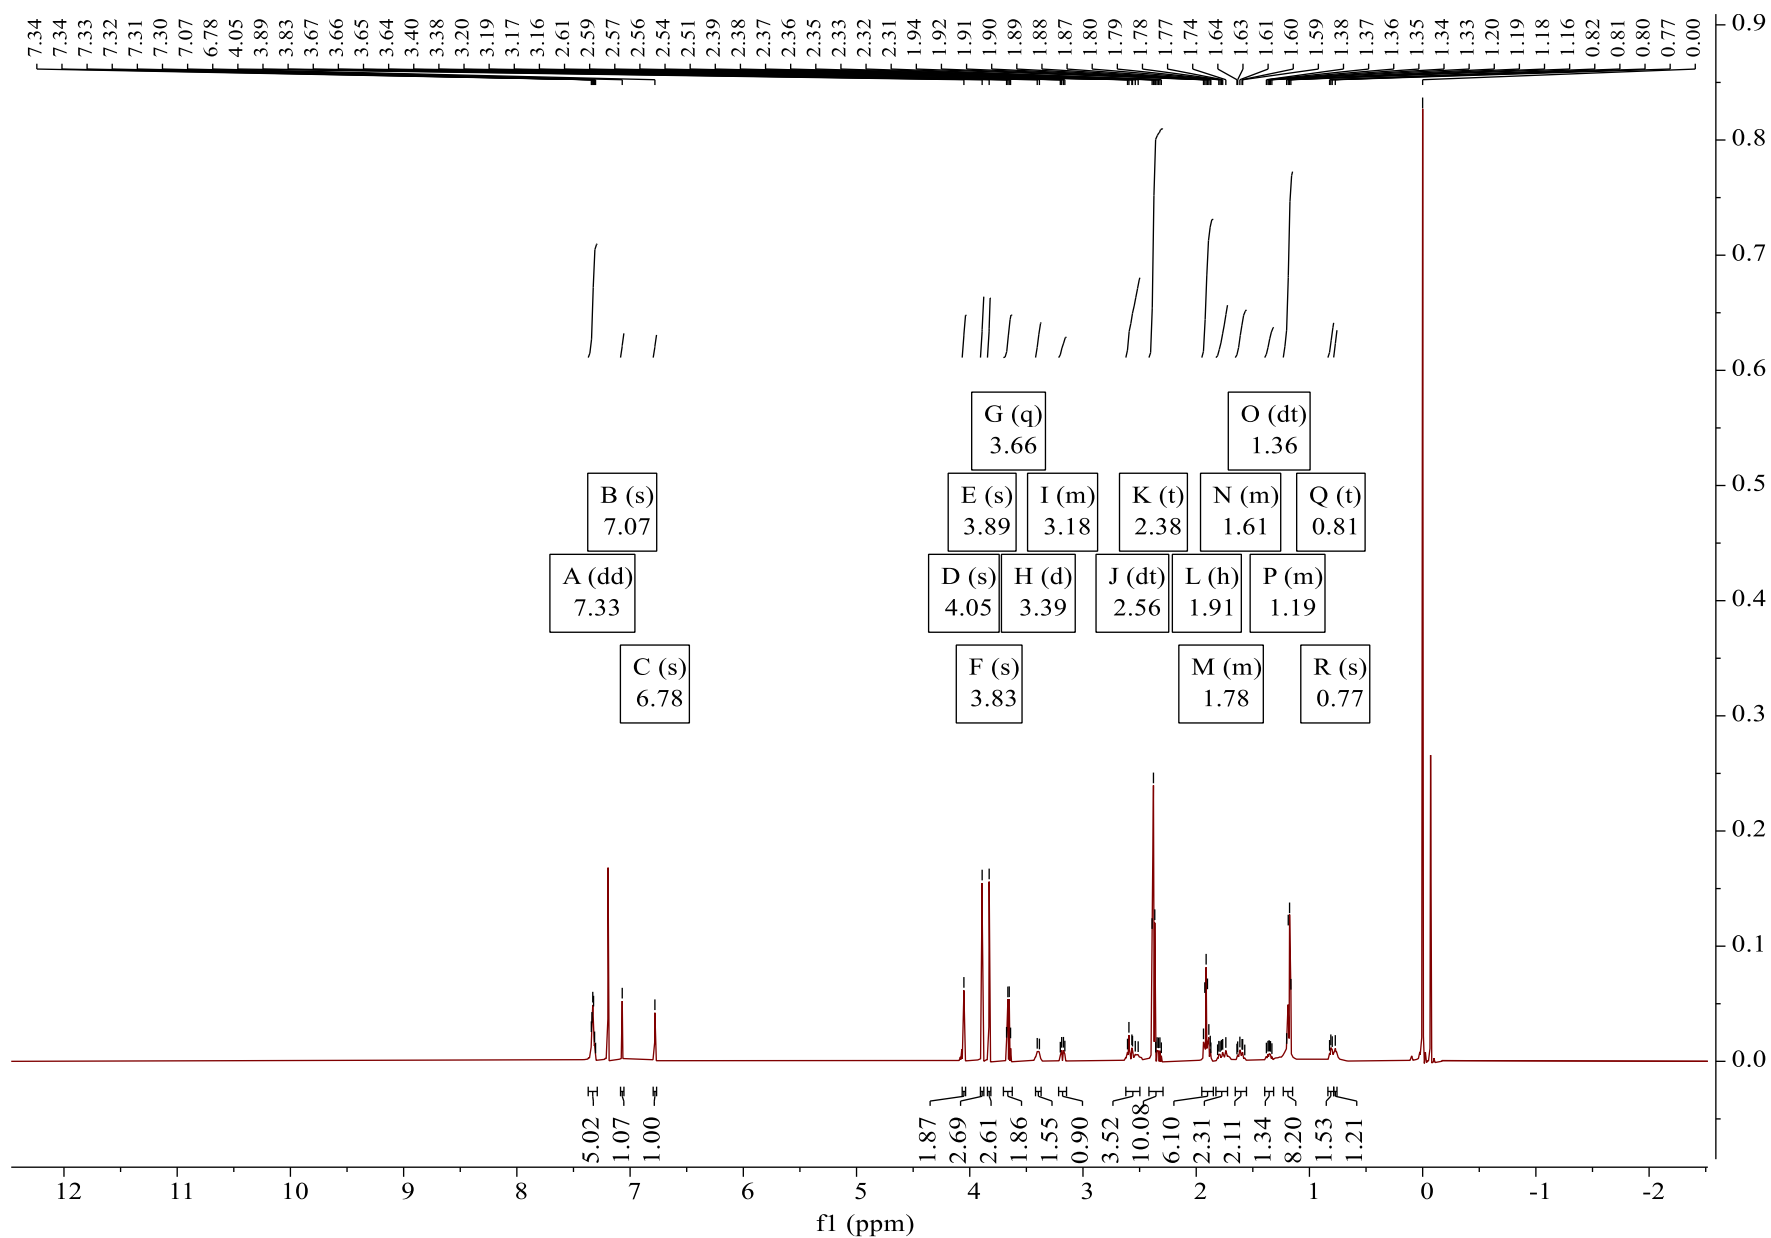

DPZ-glutaric acid IL



**Figure S4.**  $^1\text{H}$  NMR spectrum of DPZ-itaconic acid IL.

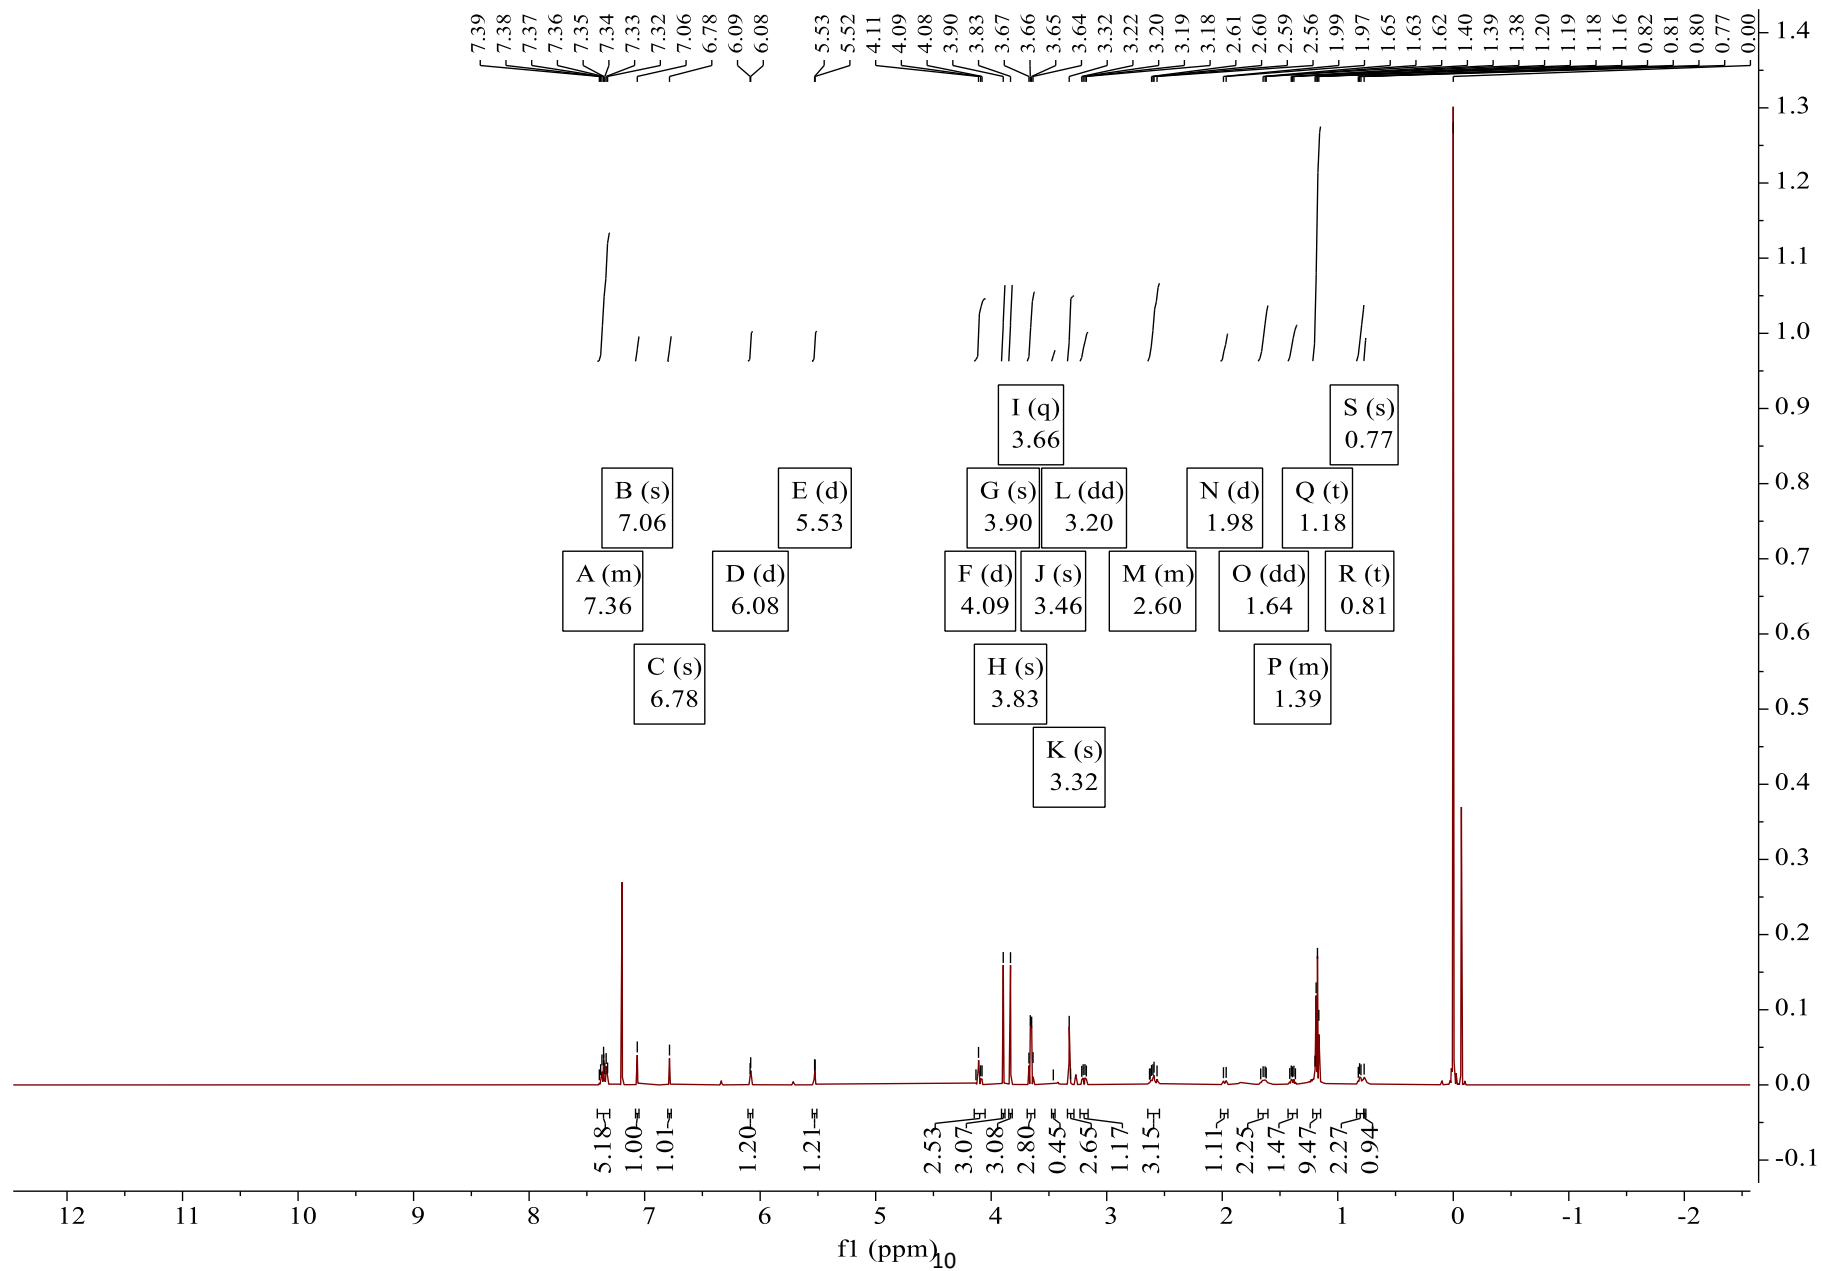

DPZ-itaconic acid IL

**Figure S5.**  $^1\text{H}$  NMR spectrum of DPZ-maleic acid IL.

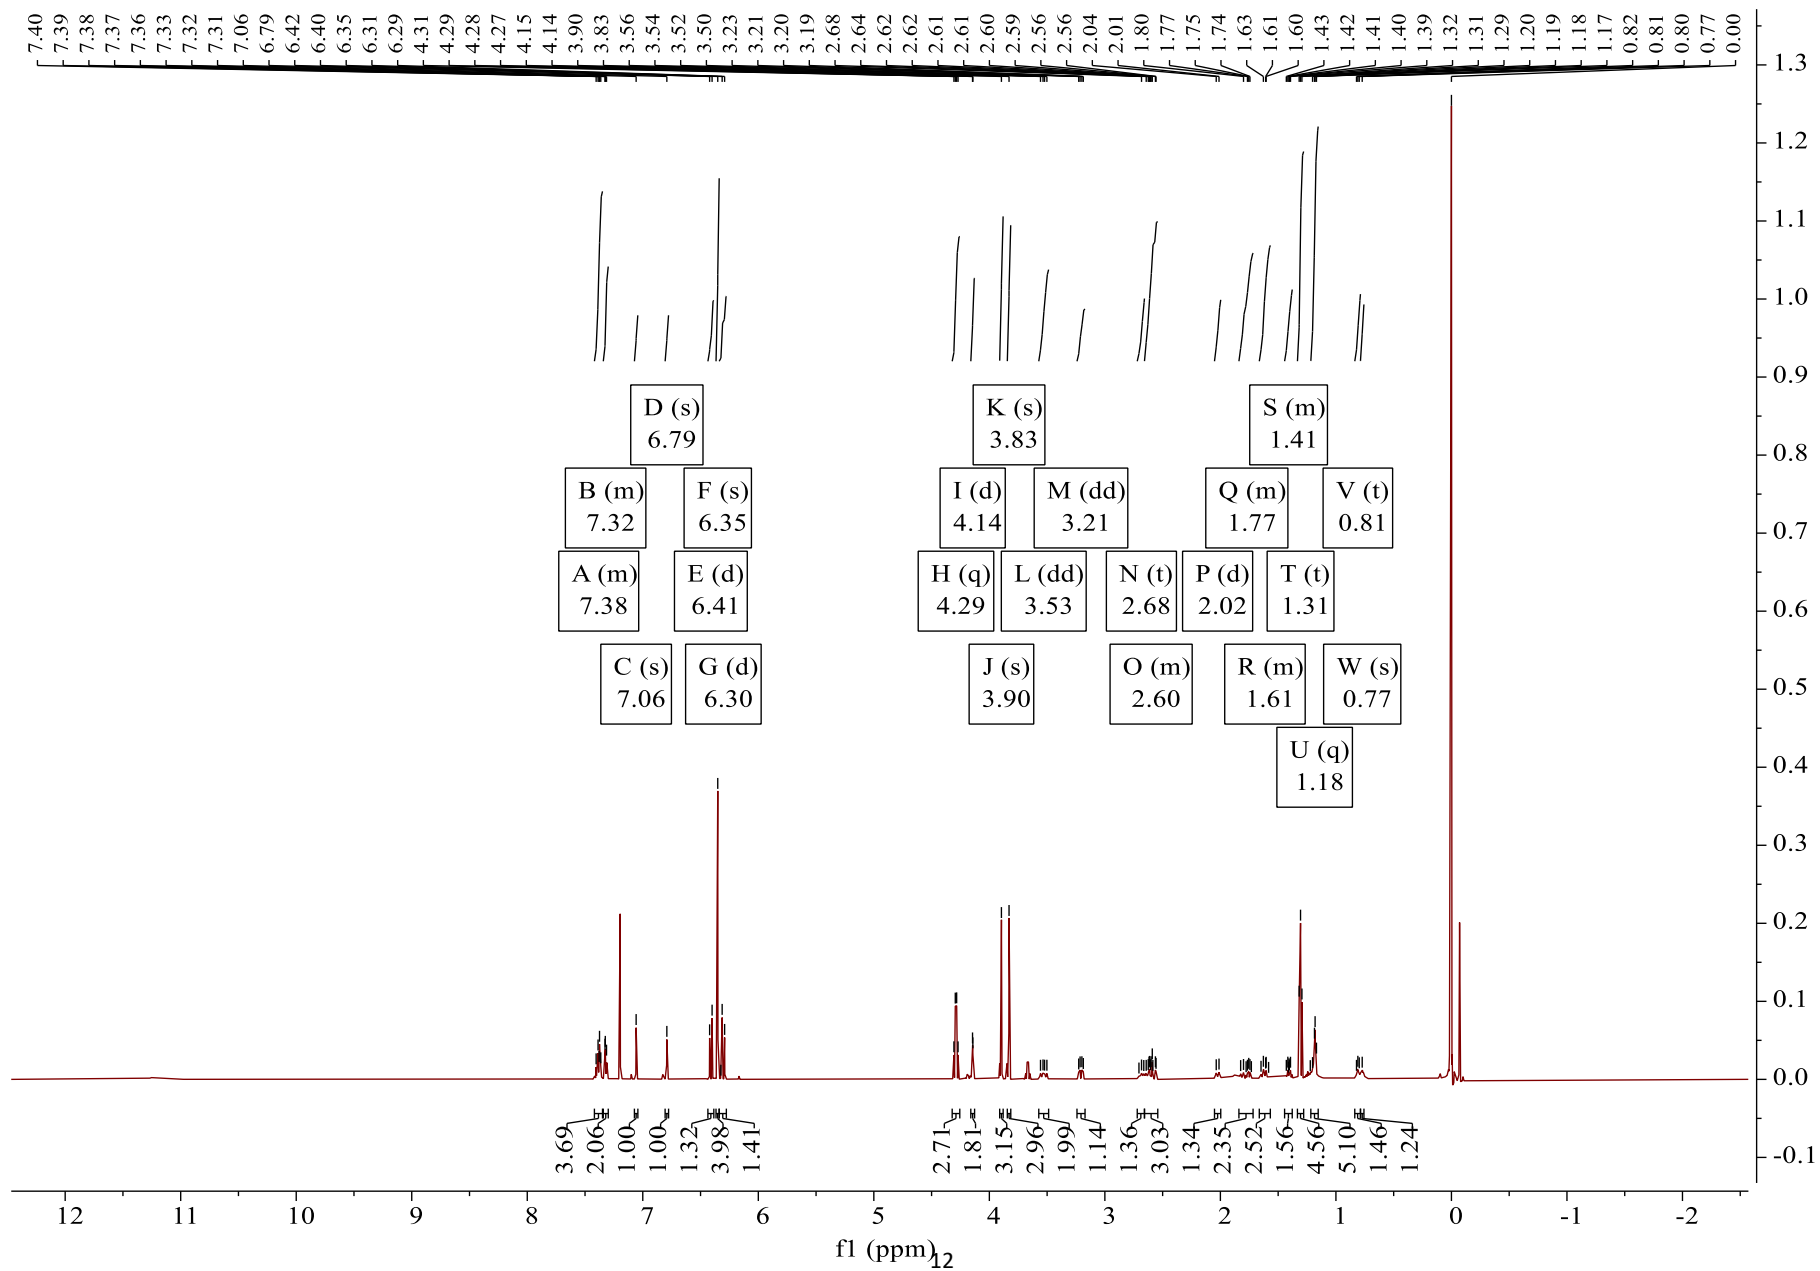

DPZ-maleic acid IL

**Figure S6.**  $^1\text{H}$  NMR spectrum of DPZ-malic acid IL.

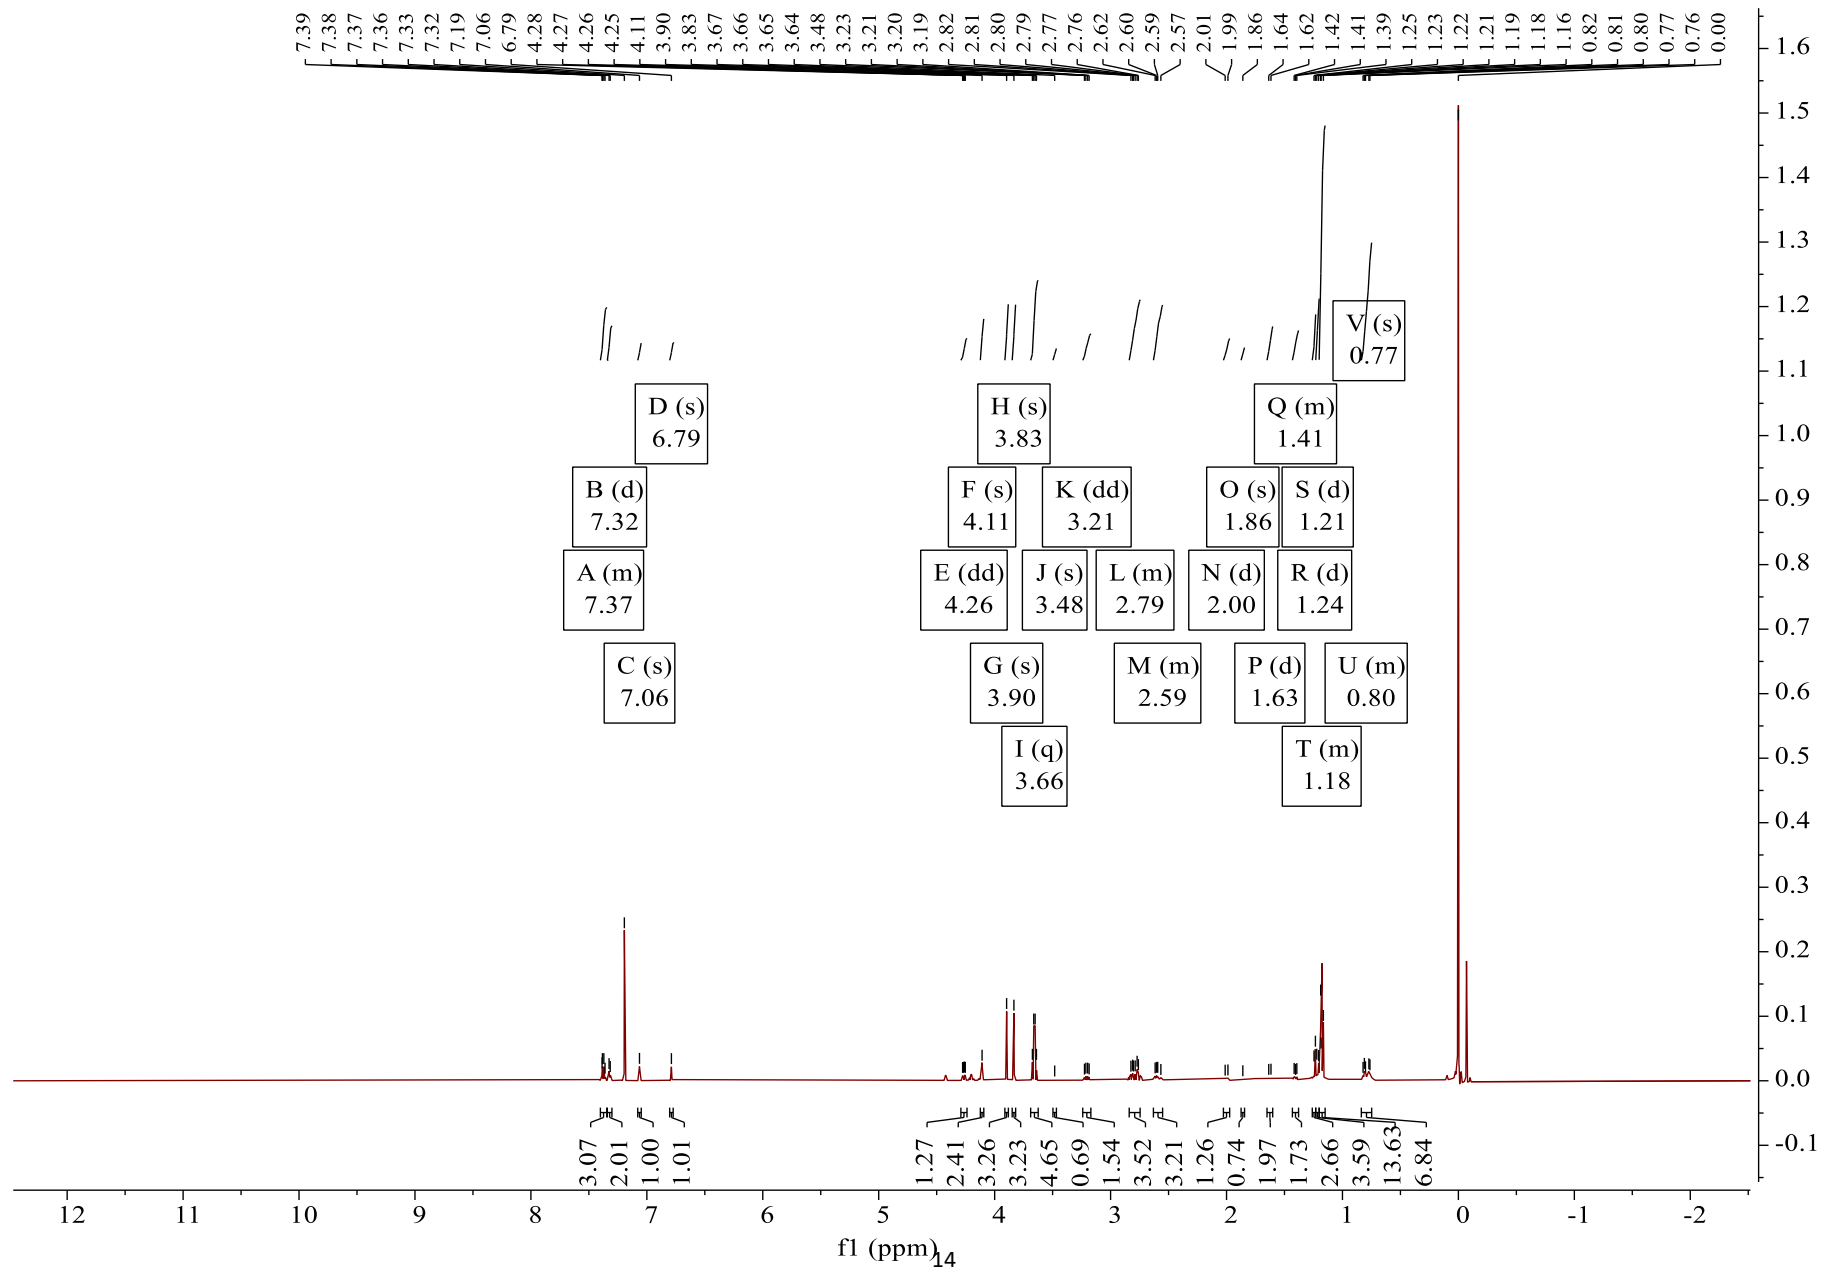

DPZ-malic acid IL

**Figure S7.**  $^1\text{H}$  NMR spectrum of DPZ-phthalic acid IL.

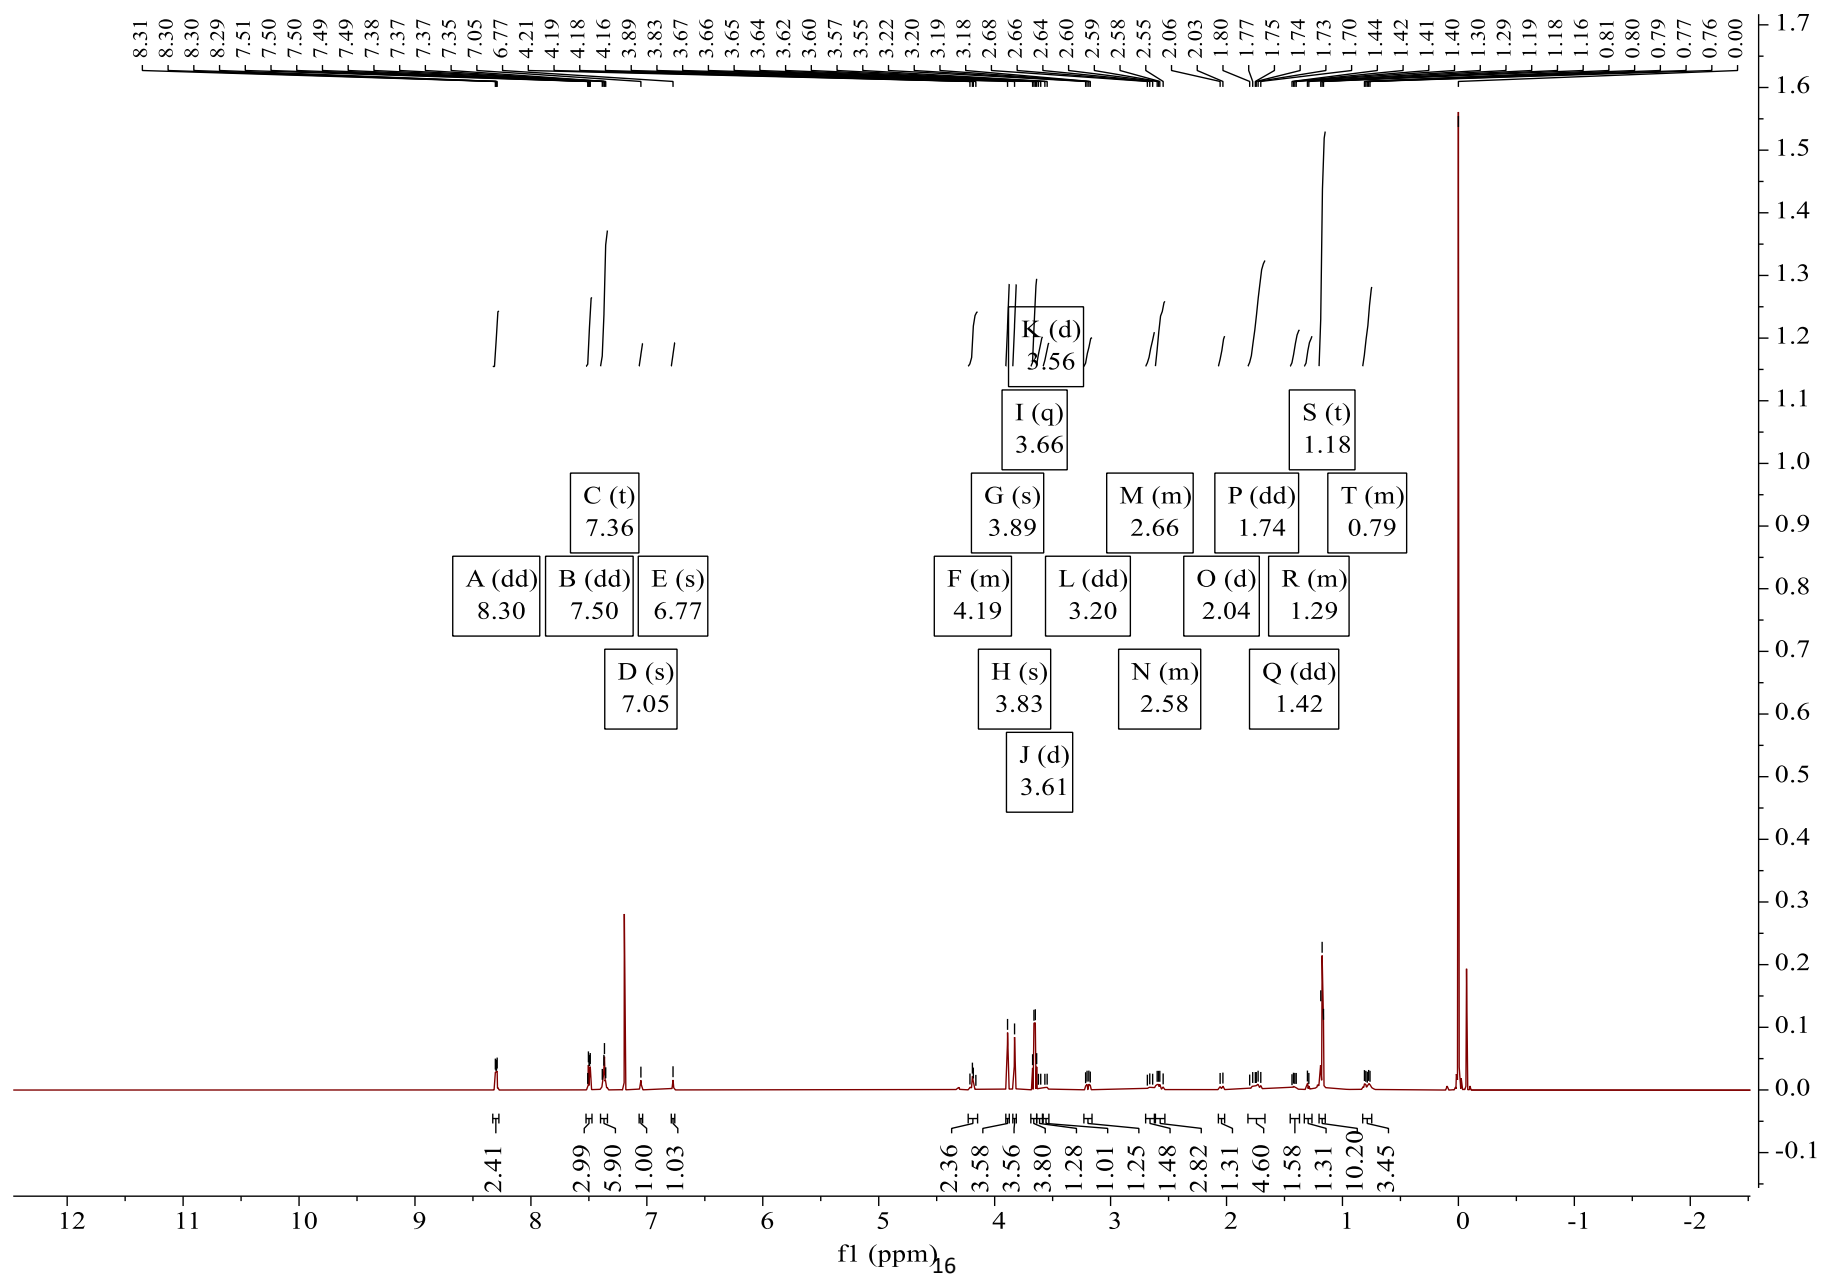

DPZ-phthalic acid IL



**Figure S8.**  $^1\text{H}$  NMR spectrum of DPZ-pimelic acid IL.

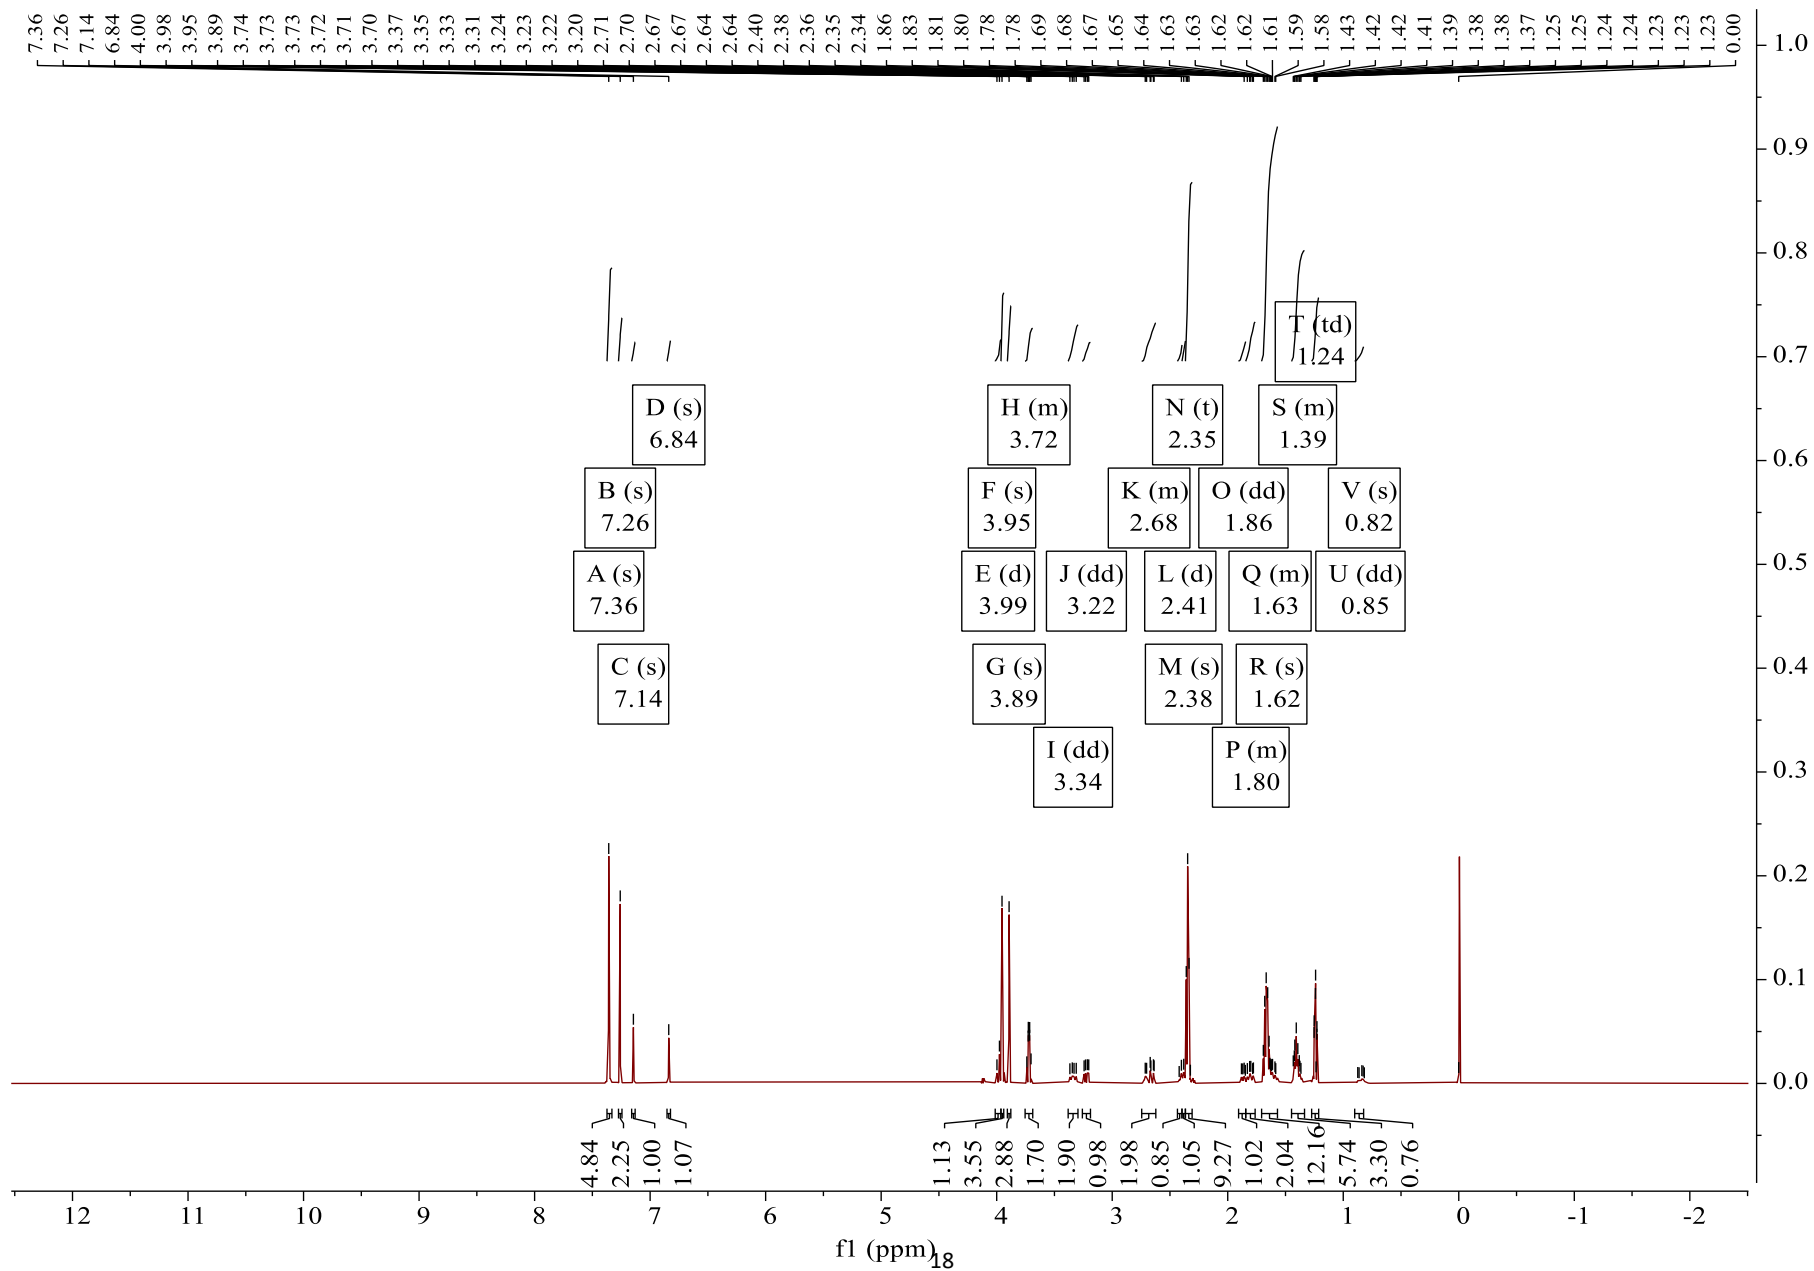

DPZ-pimelic acid IL

**Figure S9.**  $^1\text{H}$  NMR spectrum of DPZ-sebacic acid IL.

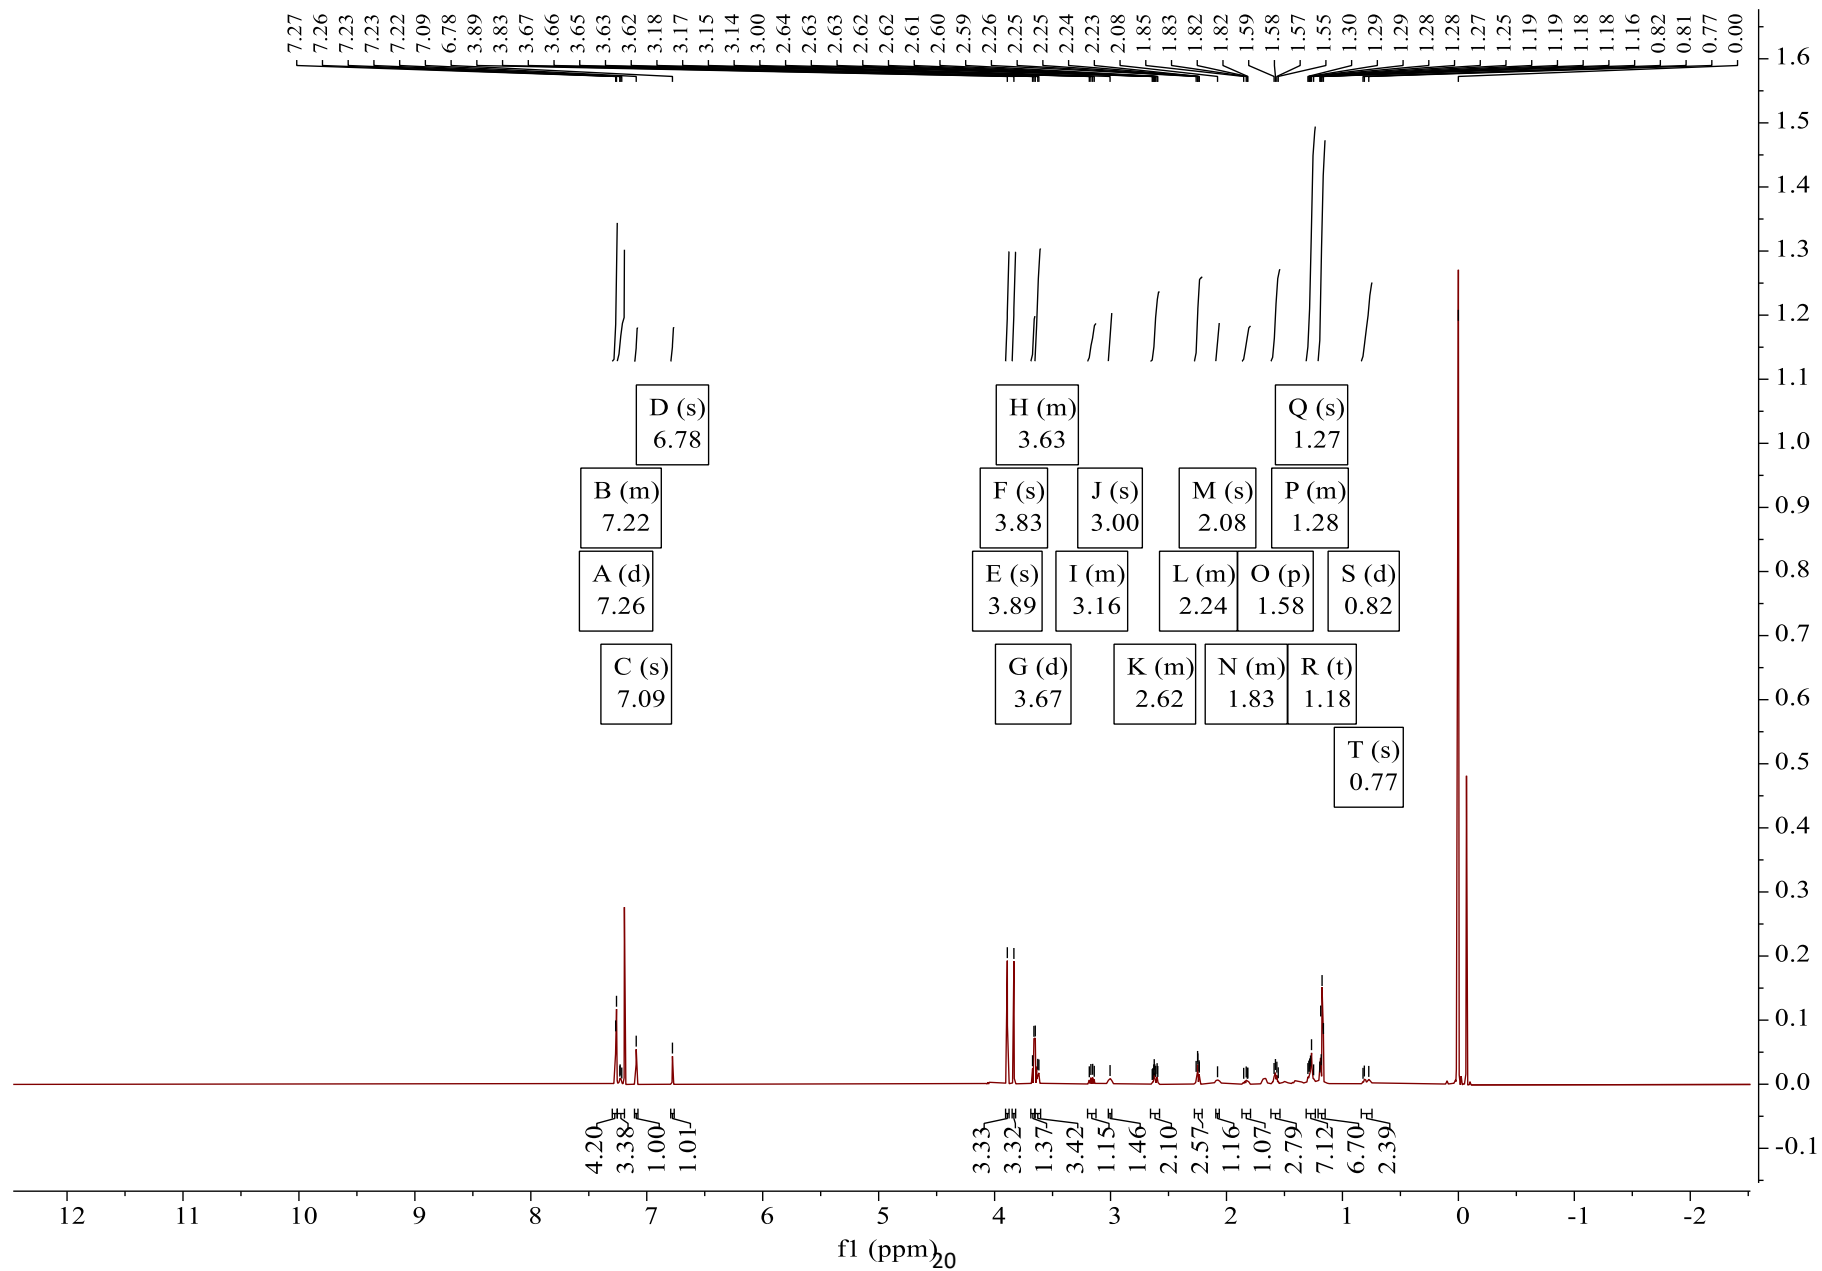

DPZ-sebacic acid IL

**Figure S10.**  $^1\text{H}$  NMR spectrum of DPZ-suberic acid IL.

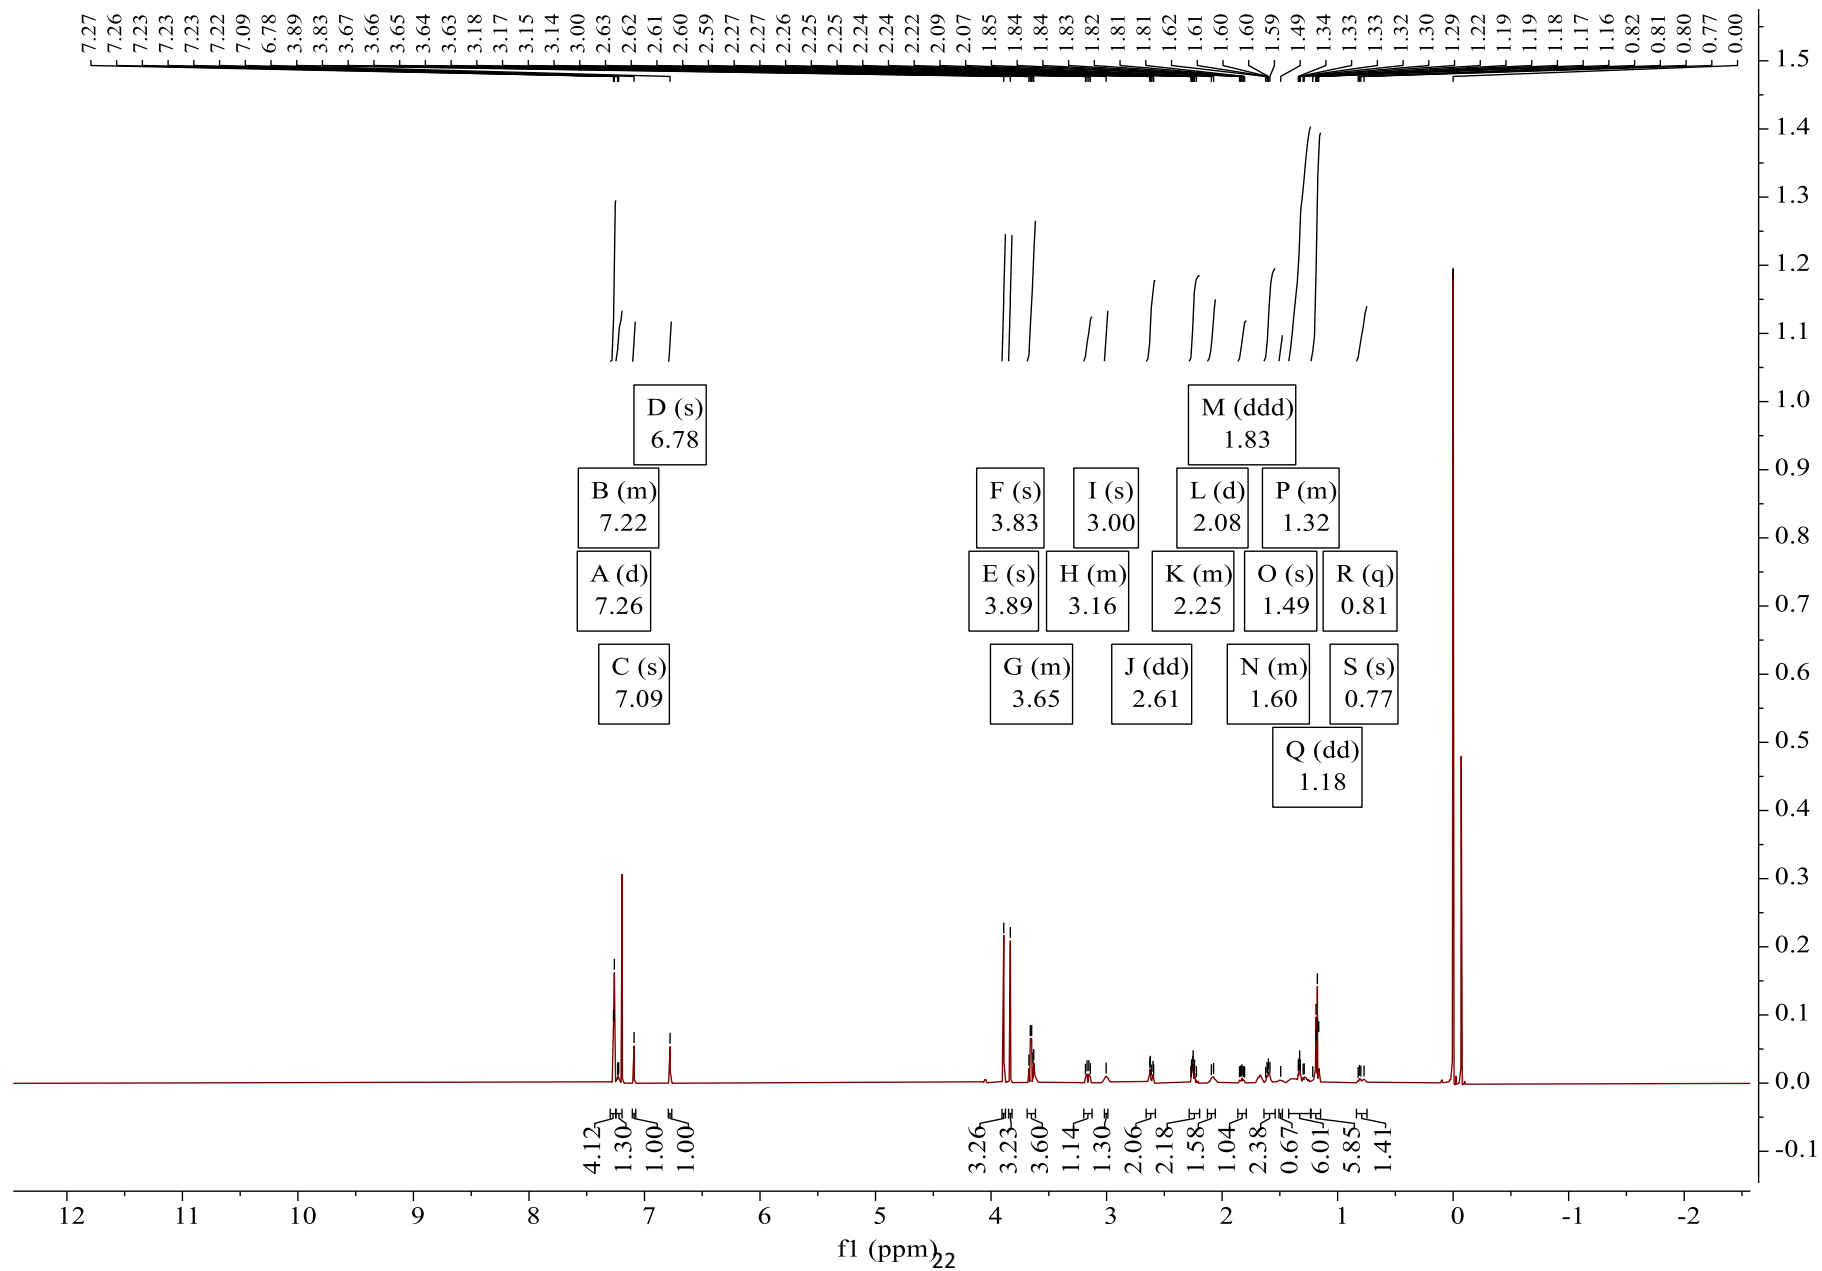

DPZ-suberic acid IL

**Figure S11.**  $^1\text{H}$  NMR spectrum of DPZ-succinic acid IL.

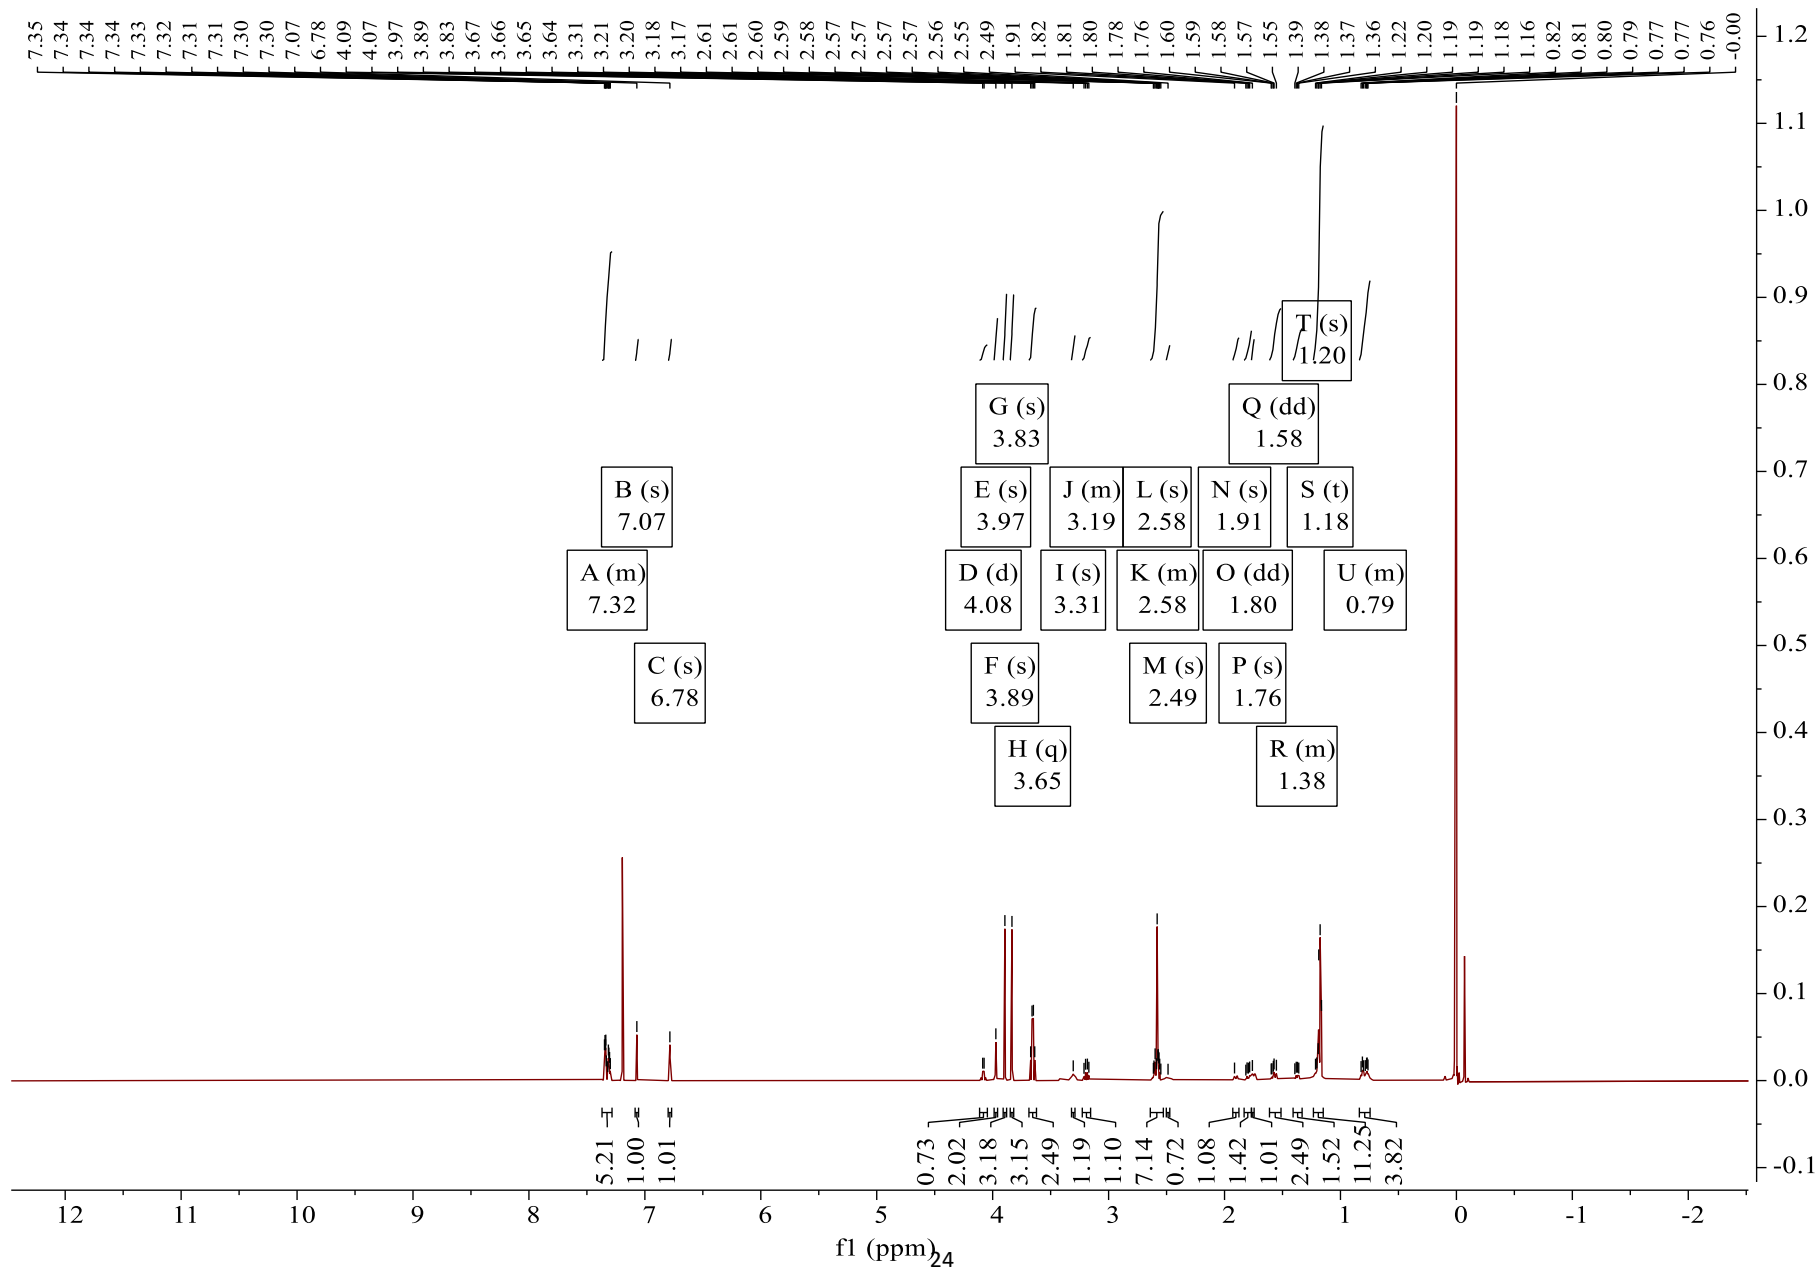

DPZ-succinic acid IL



**Figure S12.**  $^1\text{H}$  NMR spectrum of DPZ-tartaric acid IL.

DPZ-tartaric acid

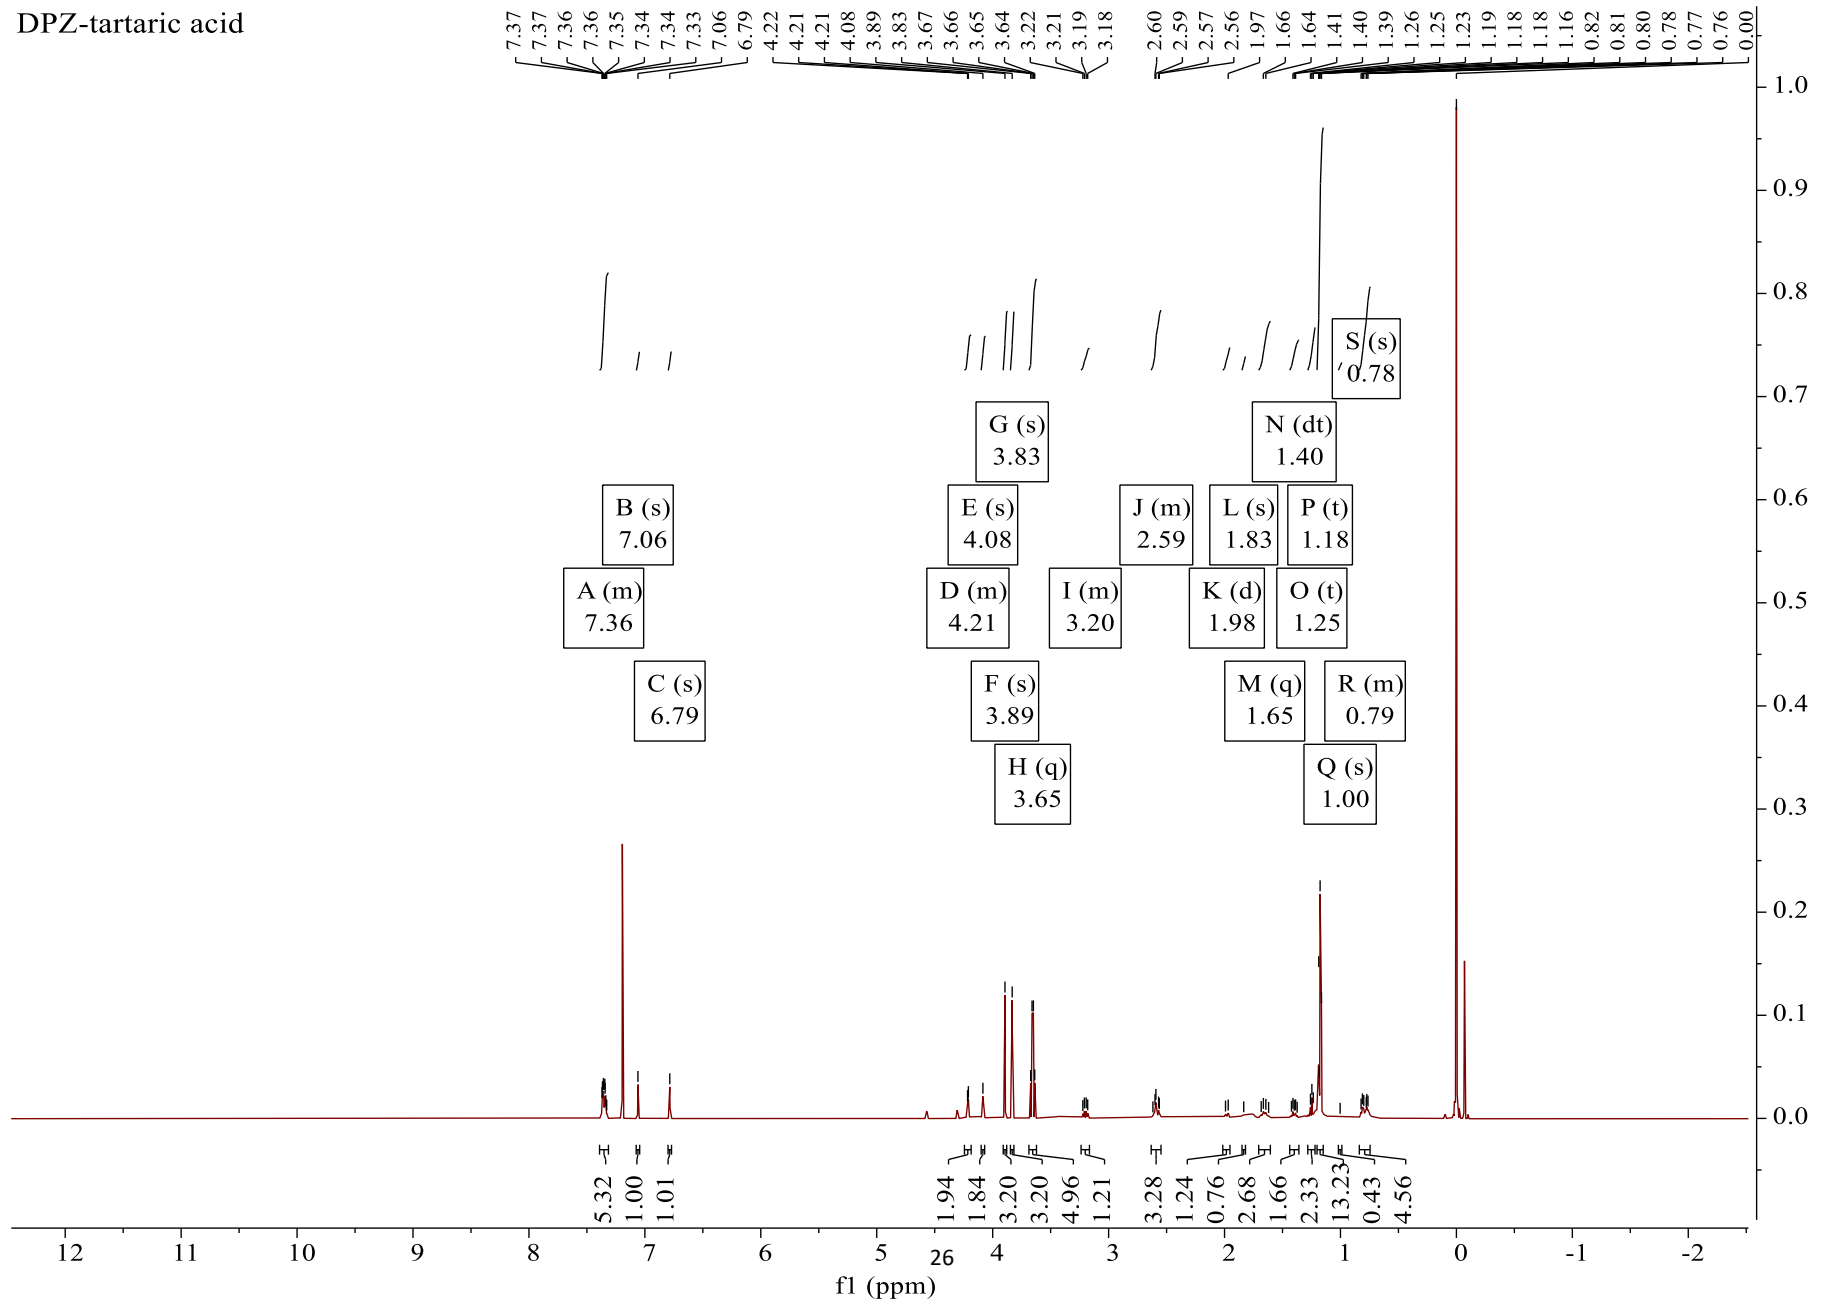

**Figure S13.**  $^1\text{H}$  NMR spectrum of DPZ- $\alpha$  keto glutaric acid IL.

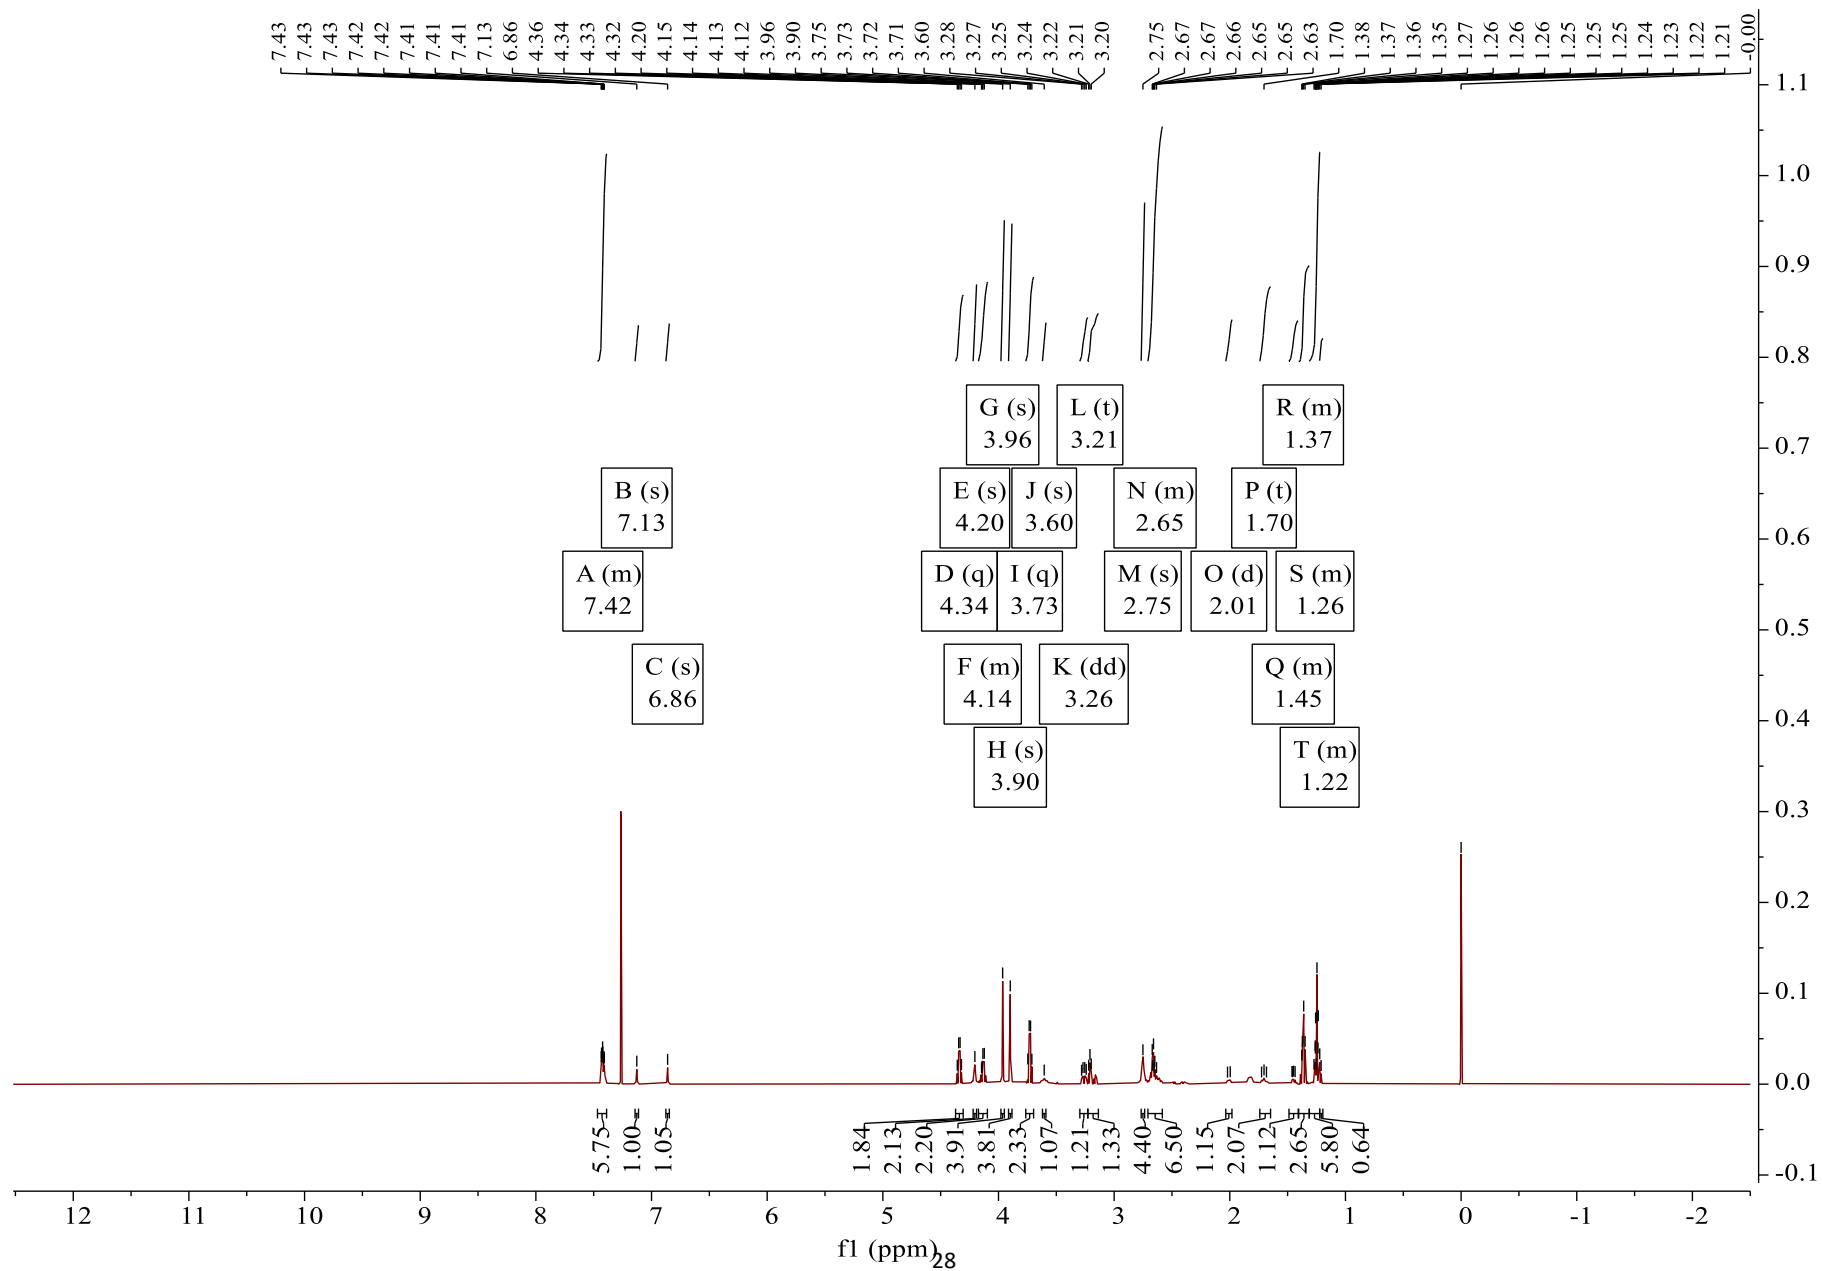

DPZ-alpha-keto glutaric
